# Supplementary material for: Genotypic Analysis of Kaposi’s Sarcoma-Associated Herpesvirus from Patients with Kaposi’s Sarcoma in Xinjiang, China
Source: PubMed Central journal article supplement (PMC4276930; doi:10.3390/v6124800), 2014-11-26
Supplement: viruses-06-04800-s001.pdf [file viruses-06-04800-s001.pdf]

## Supplementary Materials

### Genotypic Analysis of Kaposi's Sarcoma-Associated Herpesvirus from Patients with Kaposi's Sarcoma in Xinjiang, China

Xinxing Ouyang, Yan Zeng, Bishi Fu, Xiaowu Wang, Wei Chen, Yuan Fang, Minhua Luo and Linding Wang

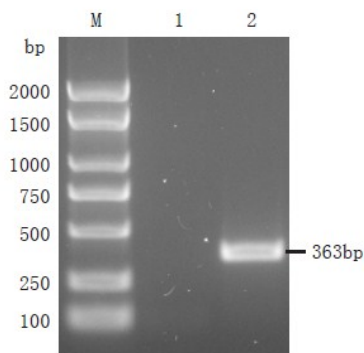

**Figure S1.** 363 bp of KSHV K1 gene amplified by nested-PCR. M, mark; 1, negative control; 2, Nested-PCR product of DNA sample extract from KS tissue.

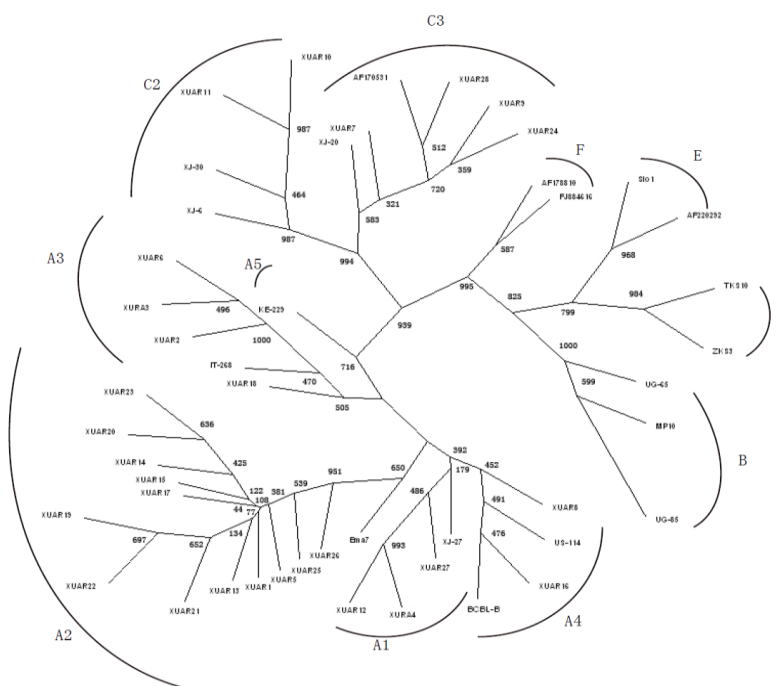

**Figure S2.** Phylogenetic tree of KSHV ORF-K1 DNA sequences constructed by phylip (version 3.68) using the neighbor-joining algorithm (1000 replicates). Relationships of KSHV isolates in present study and isolates in the literature were shown. KSHV isolates in present study were named by XURA. XUAR1-XUAR23 were isolated from classic KS tissues, XURA24-XUAR28 were isolated from AIDS KS tissues. Ema7, US-114, BCBL-B, IT-268, KE229, XJ6, XJ20, XJ-27, XJ-30, AF170531, AF178810, AF220292, FJ884616, UG-65, UG-85, MP10, TKS10, ZKS3, Sio1 were download from NCBI.
